# Supplementary material for: Structural, elastic, and electronic properties of chemically functionalized boron phosphide monolayer
Source: PubMed Central journal article supplement — RSC Adv. 2021 Feb 24;11(15):8552–8. doi: 10.1039/d1ra00576f (PMC8695274; doi:10.1039/d1ra00576f), 2021-02-24
Supplement: RA-011-D1RA00576F-s001.pdf [file RA-011-D1RA00576F-s001.pdf]

## Supporting information

### Structural, elastic, and electronic properties of chemically functionalized boron phosphide monolayer

Tuan V. Vu, A.I. Kartamyshev, Nguyen V. Hieu\*, Tran D.H. Dang, Sy-Ngoc Nguyen, N.A. Poklonski, Chuong V. Nguyen, Huynh V. Phuc, Nguyen N. Hieu\*

\*Corresponding authors: nvhieu@ued.udn.vn; hieunn@duytan.edu.vn.

**Table S1.** Coordinates of atoms in the functionalized BP monolayer with Br and Cl atoms. Cl(Br)<sub>B/P</sub> indicates the Cl(Br) bonded directly to B/P atom.

| Configuration | Atom            | <i>x</i> | <i>y</i> | <i>z</i> |
|---------------|-----------------|----------|----------|----------|
| Cl-BP-Cl      | B               | 0.33333  | 0.66667  | 0.51813  |
|               | Cl <sub>B</sub> | 0.33333  | 0.66667  | 0.61023  |
|               | P               | 0.66667  | 0.33333  | 0.48742  |
|               | Cl <sub>P</sub> | 0.66667  | 0.33333  | 0.38423  |
| Cl-BP-Br      | B               | 0.33333  | 0.66667  | 0.51479  |
|               | Cl              | 0.33333  | 0.66667  | 0.60661  |
|               | P               | 0.66667  | 0.33333  | 0.48430  |
|               | Br              | 0.66667  | 0.33333  | 0.37430  |
| Br-BP-Cl      | Br              | 0.33333  | 0.66667  | 0.51598  |
|               | B               | 0.33333  | 0.66667  | 0.61454  |
|               | P               | 0.66667  | 0.33333  | 0.48624  |
|               | Cl              | 0.66667  | 0.33333  | 0.38324  |
| Br-BP-Br      | B               | 0.33333  | 0.66667  | 0.51834  |
|               | Br <sub>B</sub> | 0.33333  | 0.66667  | 0.62014  |
|               | P               | 0.66667  | 0.33333  | 0.48762  |
|               | Br <sub>P</sub> | 0.66667  | 0.33333  | 0.37390  |

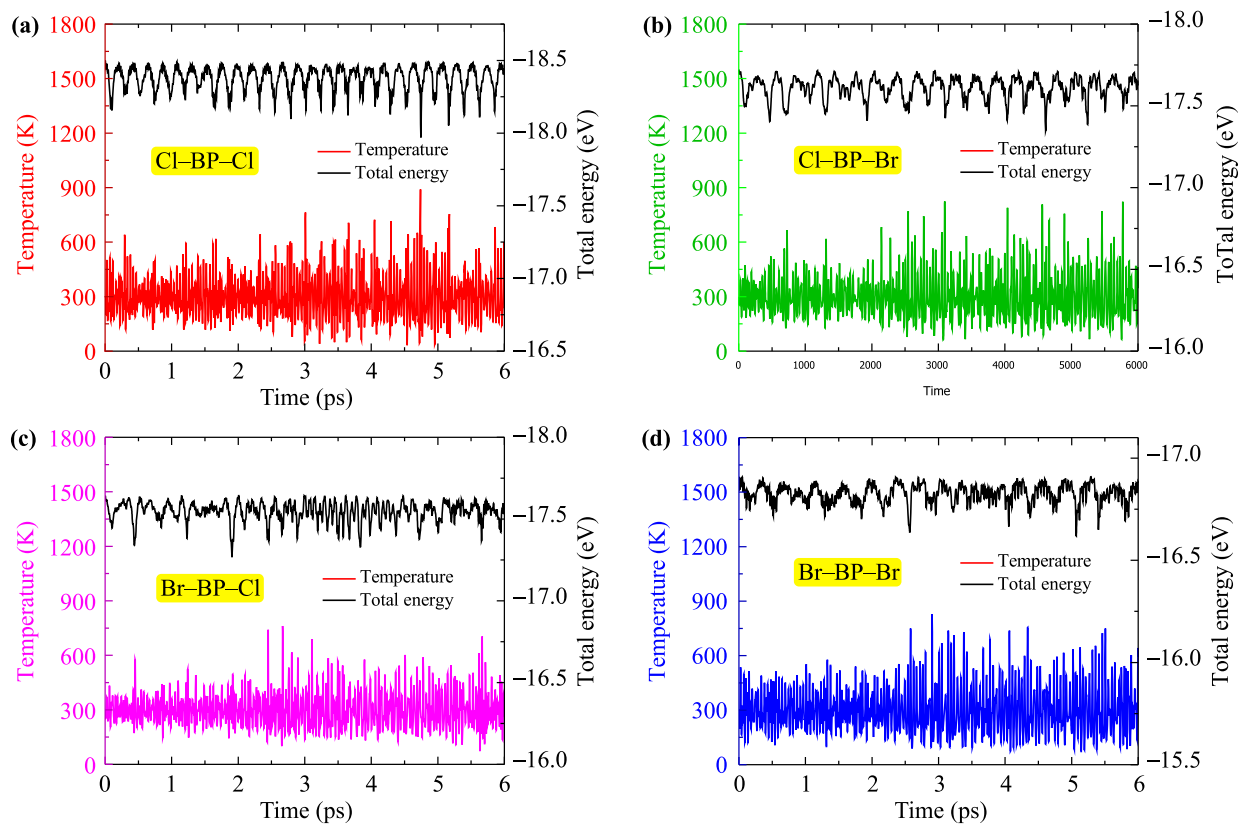

**Fig. S1.** AIMD simulations for the fluctuations of temperature and total energy as functions of time of the functionalized boron phosphide with Br and Cl: (a) Cl-BP-Cl, (b) Cl-BP-Br, (c) Br-BP-Cl, and (d) Br-BP-Br.

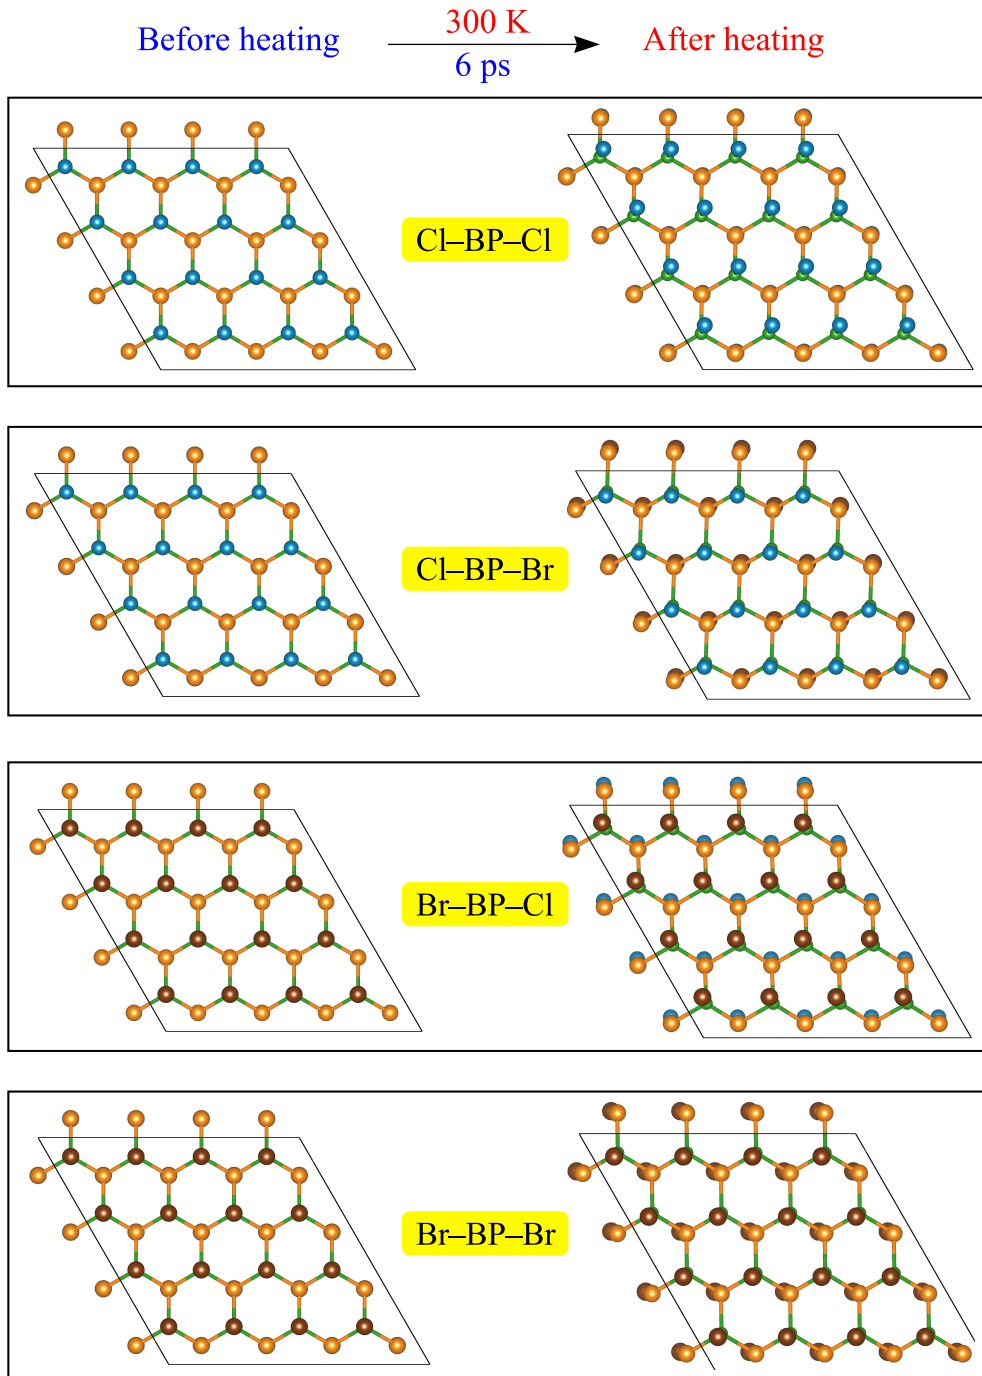

**Fig. S2.** Snapshots of the atomic structures of the surface-functionalized BP before (left panel) and after (right panel) heat treatment at 300 K within 6 ps. Green, yellow, brown, and blue balls refer to the B, P, Cl, and Br atoms, respectively.
